# Supplementary material
Source: PubMed Central journal article supplement (PMC2937571)
Supplement: NIHMS203226-supplement-01.pdf [file NIHMS203226-supplement-01.pdf]

## Cai et al. Supplementary Information

### Supplementary Methods

The 5' flanking region of the murine *Rds* gene was isolated from C57BL/6 genomic DNA using the PromoterFinder™ DNA Walking kit (Clontech Laboratories, Inc., Palo Alto, CA). The kit contains five libraries of restriction enzyme digested (EcoRV, ScaI, PvuII, SspI and DraI), uncloned, and adaptor-ligated mouse genomic DNA. Following the digestion, each pool of DNA fragments is ligated to an adaptor. The kit requires two rounds of PCR reactions. The primary PCR reaction was performed with the gene specific primer MIN88 (located in exon 1 of *Rds*) (Fig. 1A), and an adapter primer (provided in the kit). The PCR product was diluted and used as a template for the second PCR reaction using a nested gene-specific primer (MIN118 or MIN120, located in the 5' UTR of the *Rds* gene ~100 bp upstream of the ATG designated as +1, see Figure 1)) and an adapter primer (provided in the kit). 2.12kb, 1.86kb and 1.76kb PCR products were obtained from ScaI, PvuII and DraI libraries, respectively (Fig. 1a,b). Restriction analysis of the resulting sequence revealed the presence of PvuII and DraI sites within the 2.12kb fragment (Fig. 1a), which is in agreement with the PCR amplification from the libraries. We confirmed that the promoter fragments were contiguous with the entire coding region of the *Rds* gene [18] by amplifying from a mouse bacteriophage genomic library using the primers MIN136 (located within the isolated fragments) and either MIN118/MIN120 or MIN88 located in exon 1 of the *Rds* gene. The expected PCR products of 894, 931 and 1371 bp, respectively, were observed (Fig. 1c). The contiguity was also confirmed by Southern blot analysis in which an expected size of ScaI fragment was detected with the 5' flanking or exon 1 as a probe (data not shown). The same strategy was used again to obtain the larger 5' distal sequence of the gene using gene specific primers MIN147, MIN148 in combination with adapter primers 1 and 2 (same as above). A 1.4kb fragment was obtained from the PvuII library (Fig. 1a, and 1b, last lane). The contiguity of this fragment with the rest of the *Rds* gene was also confirmed (data not shown). In addition to confirmation of contiguity by PCR the isolated flanking region was successfully aligned with the database sequence for the *Rds* gene ([www.ensembl.org](http://www.ensembl.org)). To confirm that there were no gross strain differences, the full flanking region was amplified from Balb/C and C57/BL6 genomic DNA with MIN149/MIN120, and bands of equal size were observed (Fig. 1d).

To rule out the possibility that this 3.5kb 5' flanking region fragment was from an *Rds* pseudogene, amplification using sense primers within the 3.5kb fragment and antisense primers within intron 1 of the *Rds* gene was done and products of the expected sizes (2.1kb, 2.5kb, and 3.1kb) in size were consistently observed (Fig. 1e).

**Supplementary Figure 1**

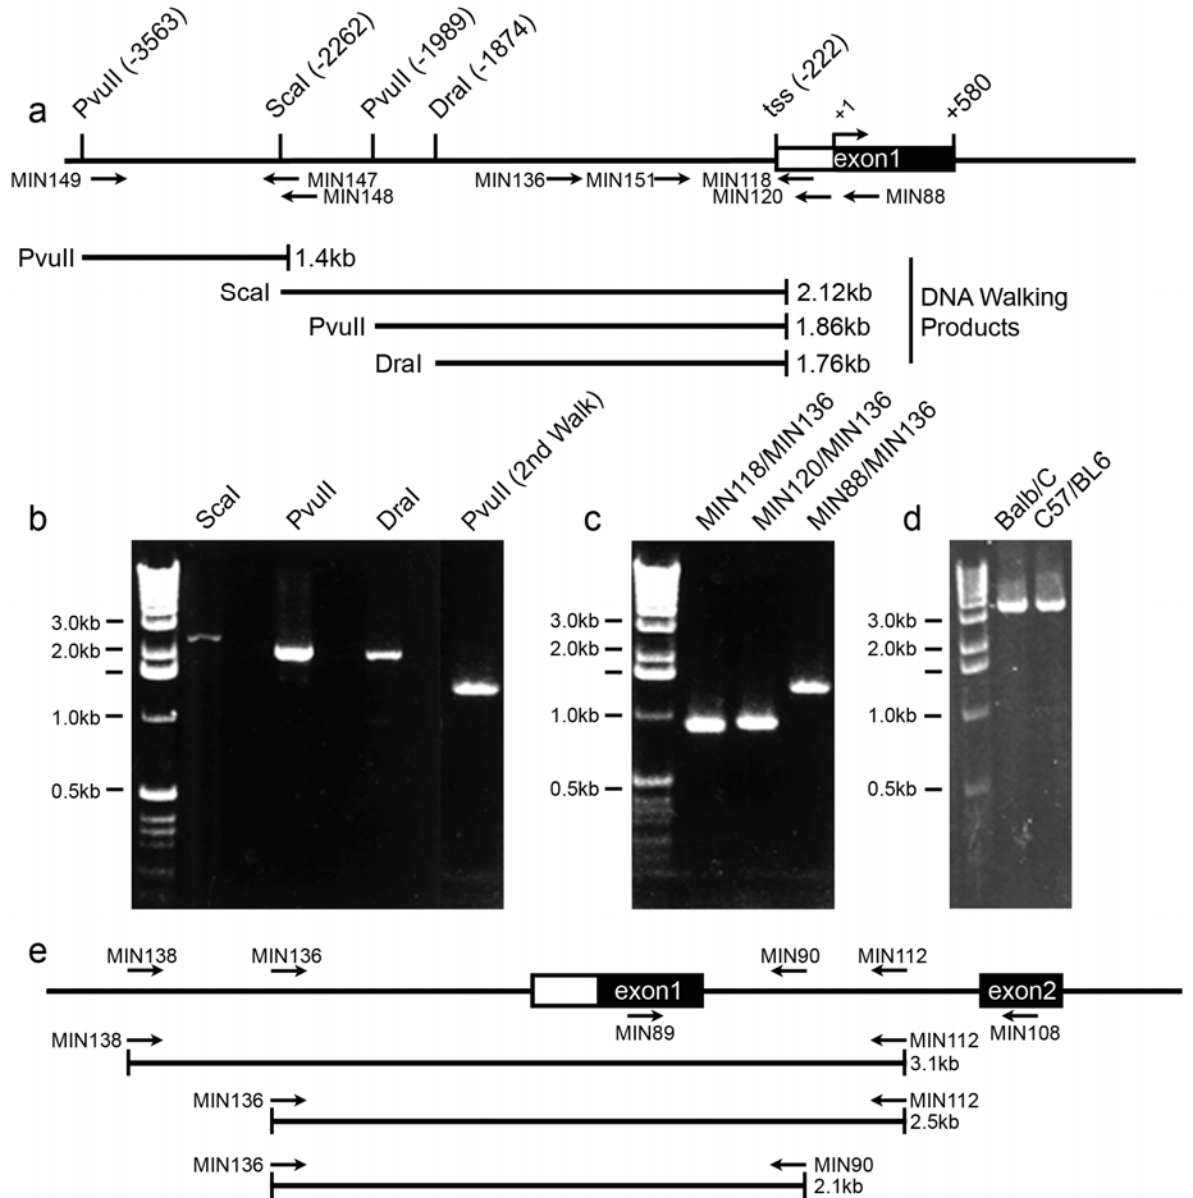

**Supplementary Figure 1. Isolation of the 5' flanking region of the mouse *Rds* gene.** **a.** Schematic showing amplification plan. Depicted are the relative location and direction of the different gene-specific primers designed to isolate and amplify the 3.5kb flanking region fragment of the mouse *Rds* gene. The ATG start codon is defined as +1 while the transcription start site (tss) is -222. **b.** PCR products obtained from amplification of three different libraries were visualized on a 1% TBE agarose gel. The name of each library is indicated on top of each lane. PCR reactions without any DNA template were included as negative controls. The same strategy was applied again and the product obtained from the PvuII library was shown in the last lane. **c.** The contiguity of the 3.5kb fragment with the *Rds* gene was confirmed by PCR amplification. The primer sets used in each amplification are shown on top of each lane. **d.** Amplification of the 3.5kb fragment from Balb/c and C57BL/6 genomic DNA using MIN120/MIN149 primer sets. **e.** Depicted are the relative location and direction

of the different primers designed at the 5' end of the 3.5kb fragment and intron 1. The sizes of the products with different primer sets were also indicated.

## Supplementary Figure 2

[ 5' flanking region

Vector                      **PvuII**                      E-Box

-3588 GCGTGGTTCGACGGCCCCGGGTCTG**CTG**TTTTGTCTGTATGTGTACCTGT**GTGCCATGTG**

MIN149→                      E-Box

-3528 **CATGCCTGTTACCTGAGGAGACAAGAAGAGATCATCAGGTGCCAGCCACC****CGCGTGG****GTG**

Mamalian transcriptional repressor

-3468 **GTGGGAATTGAA**TCTGGATCTTCTGTGAAGAGCAGCTAGGGCTCTGTTTGTGTTTGTGTT

-3408 TGTGTTGTTGTTGTTGTTGTTTTCGAGACAGGGTTCCTCTGTGTAGCTCTGGCTGTCCTG

RTR

-3348 GAACTCACTCTATAGACCA**GGCTGGCCTTGA**ACTCAGA**AATCCGCCTGCCTCTGCCTCTT**

-3288 AAGTGCTGGAGTTAAAGGTGTGTGCCACCACTGCCGAGCTCTTTTTTTTTTTAAAGAAAT

-3228 GTTTGAAGATTTATTTATTTATTTATTTATATATGTAAGTACACTGTAGCTGTCTTTAGACGC

CAR/RXR & PNR                      E-box

-3168 ACCAG**AAGAGGGCATCAGATCTCATTACGG**GTGGTTGTGA**CCACCATGTGGTT**GCTGGG

-3108 **ATTTGAACTC**CGGACCTTCGGAAAACCAGTCGGGTGCTCTTACCCACTGAGCCATCTTAC

PNR

-3048 CAGCCCCTTTTCTTTTTCTTTTTGAGTTCCAGACAGGGCTTC**TCTATGTACTTTTTT**

-2988 TCCCTGGCTGTCTGGACTCTCTTGGTAAACCAGGCTGGCCTAAGAAATCCACCTGCCT

VDR/RXR

-2928 CTGCCTTCT**GGTGCTGGGATCAAAGCGTGTGC**TACTACCACCTGGCTTGGATTTTGTA

-2868 TTTTTATTTACTTCTTTTTGTTTTTTTTTTTTTTTAATTTTGGAGGGGGTGTCTCTG

CAR/RXR

-2808 GGAGGGAGGGTGAA**TTGAGAGGACCGGAAGTACATGGA**ATTGGGGCGGTTATGTGAA

Mef2C

-2748 ATATCCAAATAATCAATAAACAATAAAGGTAAAAAATCA**GCGGCTTAAAAAATAAT**

**SmaI**

-2688 **TTCAA**ACAGACACTTCATAGAAGAAGGTACAGGTGATAAATAAGCAAGGAAAGGTG**CCCCG**

-2628 **GGGATGGGGAATGGACCCATGGGTAAAGAAAGCGTGAGACCTAGGGTCCAGTCCCTAGCA**

-2568 GCCATGTAGAACCGCTGGCATGGTGGCTCATTCCCAGAACCCCTCGTCTAGGAGCCGGGCA

-2508 TGATCTGGGCTCCCTGGGCAGCCAGCCTGCCAGGAGGAGCCTAGCAGAGAGAAAGACGG

GC-Box

-2448 CAACGCT**CTGCCCTCCCCTCT**ATACAGAAGTTCTGGCACACGCACCCAACCGAACACAT

Mef2C

-2388 ATGTATGCACAGGATCCTCAGTATAAAAGTGAGGCGA**TTGCCAATTAAAAATACCAACGT**

E-Box

-2328 GCTACCTTCGT**TACACACGTGAGAAT**GGTGAAGACTGGAAGGCATGGTGGCACACACCTCT

**ScaI**                      GC-box                      MIN138→

-2268 AATCCC**AGTACT**TGGGAG**GCAGGGGTGGGGTGGGGTGC**GGATCTCTGTGAGCTTGAGAGC

-2208 **TGCCTGAGCTACATAGTAAGTTCCAGGACAACCCAGGACTACCTAGAGAGACCCTGTCTC**

GC-Box                      GAGA-box

-2148 AAAAAAGCC**AGGGGGTGGGGGAC****CAGAGAGAGAGAGAGAGAGAGAGAGAGAGAGAG**

←MIN147                      ←MIN148

-2088 **AGAAAATTGGGGCAG**GAGAGGTGTCCCTTGTGCTTTACAGGGACTGGTGT**GGTCCCA**

SP1                      **PvuII**

-2028 **GCCCCTA**CAACTAGATAGCCTCACAACTGCCTGTAAC**CTCAGCTGC**CAGAGATTCAGTCGC

E-box & VDR/RXR

-1968 CCTCTTCTGGTTCTGTGGGC**TCTGCACCCACGTGCACATCTCCC**ACCTCCACTTACAT

**DraI**                      PXR/RXR

-1908 ACATAATAAAAAGAAAATCTTT**TTTAAAAA**AT**GTAGCCGGTCATGGTGGTGCATGC**CTT

Otx2                      VDR/RXR

-1848 **TAATCCCAGCA****T**CGGGAGGTAGAGGCAGGCCAGCCT**GGTCTACAAAGTGAGTCCAGGA**

-1788 CAGCCAGGGCTACACAGAGAAAACCTGTCTCAAACAAAACAAAACAAAACAAAAGT

AP1 NF1

-1728 ATACTTCAGCCGTTGAGTCAGAAAGGGGGATAAATTCAGGCTAGCCTTGGCCACAAGGC

-1668 AAAATCCTGTCTCAAACAACAATATAAAATATAACAAGTCATTCAAGCTAGTCTGGT

-1608 TGGACGTCTGGGGATGGTAACTCTGTATTTCTGTTCACAATTTTGTAGCCAATATCTA

RAR/RXR

-1548 CTGGGGGCTGGAGAGATGGCTCAGTGGTTAAGAGCACTGACTGCTCTTCCAGAAGTCTCTG

E-Box BglIII CAR/RXR & PNR

-1488 AGTTCAATCCCAGCAACACATGGTGGCTCACAACCATCTGTAATGAGATCTGATGCCCT

Mef2C

-1428 CTCTCTGGTGTGTCTGAAGACAAGTACAGTGTACTTATATATAATAAATAAATCTTAGAAA

-1368 AATATCTACTAATTAGAAATGACAATTAACGGCGTGGTGATGCTGAGATTGGAAGATTT

-1308 CTTCAATTTGAGGAGGCCAGCTGGTATAGTAATATGAGGGCTCTAGGGAACTTGTCTT

-1248 AACAAAGGAAAAACATGACAGAAAAACCAACCCCAACAGCAACAAAACATAGCCGACTCA

VDR/RXR

-1188 CTCCCTAAGGCTTCCATGCCCTTGCTGTGACCACAGTGGCAGATGTATTGCTCCTTTG

MIN136→ EsrrB

-1128 GTTGATTCTTTGTTTGCTTGTGTTGTTGAGATAGGCTCTCAAGCAGCTCCCACTGACCTT

RTR

-1068 GAACTTGCTACACGTAGCTATGTGCGCTACTGTACTCCTTTAGTCTGCACTCAAGAGGC

-1008 AGAGGCAGTTGGATCTCTGTGCATTTGAAGCAATCTGTTCTACAAGGTGAGTTTCAGGCC

-948 AGCCCTGGGCTACAAAATGAGAGAGACCCTGTCTAAAATAAAAACAACTCACAAAACAC

-888 CCAACCCTAAGATAGGGCTGGAATCTGGAATTTTGTGTTGTGATCTTTAGTTGAGAC

-828 AAGGTTTCTCTGTGTATCCCTGGATGTCTGGAATCCTTTGTAGACCAGGCTGGCCTGG

Mef2C

-768 AACTCAGAAATATGCCTACCTCTGCTTCCCTAGTGATAGGATTGACAGTGTGGGCCACTG

E-Box AP1

-708 CTGTCTTTGTTTGTAACTTAAACACATGTGAATGGTGGTTTTTCTGCCTGTAGGTCTGT

-648 GAATCATTATGTGTCTGGCTCATGGAGCCAGTATTGGGTATCAGATCCCCTAGAACTGA

-588 GTTACAGATGGGGGTGAGCTTTTGTGTGGGTGCTGGGAACCAAGTCTGAACTCTCTGTAA

-528 GAGCAGTCAGTGCTCTTAACCACGGAGCCATCTCTCCAATCCCCTCTCTTGGCCTCAGAC

VDR/RXR & MIN151→

-468 TCACAGACCCAAGAGAACCTCACTGAGGCGTGCAGGAAGTCCAGCCTATTCTTTTAGC

-408 CAGCCTCTGTCTTTTGGCTCTGGATTCTTGAGCTGAGCTGGGTCCAGCATGTATATACA

CAR/RXR

-348 CGGAGACTCCTCTGGCCATGTTTTGTATTGGCATAGCTTTGTCTAATGGGATGACCCTG

OTX ↓ ↓ ↓

-288 GCTAAAGAGATTAGTGACTGCGTTGTGGATCCCACTTTTTAATCTGCAGTGTTCGGACTG

↓ ▽ ↓ ▽ ←MIN118

-228 TCCCTCCTTGGCTGGGAAGGACTCTGCAGATACGGCGGCTAGATTAGCTCCGGCTACCG

← MIN120 AP1

-168 TTAAGTAAAGGATCCCAAGCTAGGAGGCCCAAAATGGGCAACTCCCTGCAGC

Otx-like

-108 TTGGGCCATGGTGTCTTCCCTAGACCCTAGCGGTCCAGCCCCGGAGCTCACTCGGATT

+1

-48 AGGAGTGGAAAGCTGAACCGTGGGAGGCTGCTGAACGCACCTCGGTAAGCATGGCGCTGCTC

+13 AAAGTCAAGTTTGACCAGAAGAAGCGGGTCAAGTTGGCCAGGGGCTCTGGCTTATGAAC

+73 TGGCTGTCCGTGTTGGCCGGCATCGTCTCTCAGCTTGGGGCTGTTCTTGAAGATTGAA

+133 CTTGCAAGAGGAGCGAAGTATGAATAAATCTGAGAGCCACTTTGTGCCAACTCCCTG

+193 ATAGGGGTGGGGTCTGTCTGTGTCTTCAACTCTCTGGCTGGGAAGATCTGCTATGAT

←MIN88 ←MIN89

+253 GCCCTGGACCCGGCCAAGTACGCCAAGTGAAGCCCTGGCTGAAGCCGTACCTGGCTGTC

**Supplementary Figure 2. Sequence of 3.5kb of the 5' flanking region of the mouse *Rds* gene.** E-boxes are shaded in gray; GC boxes and GAGA box are highlighted and rectangled, other cis-elements are indicated as rectangles. Transcription initiation sites by either arrows (minor initiation site) or arrow heads (major initiation sites) [21]. The ATG translation start codon was defined as +1.

**a** Supplementary Figure 3

|           |       | Section 1                                                            |     |     |     |     |     |     |  |  |     |     |
|-----------|-------|----------------------------------------------------------------------|-----|-----|-----|-----|-----|-----|--|--|-----|-----|
|           |       | (1) 1                                                                | 10  | 20  | 30  | 40  | 50  |     |  |  |     | 67  |
| Mouse     | (1)   | -----                                                                |     |     |     |     |     |     |  |  |     |     |
| Cow       | (1)   | -----                                                                |     |     |     |     |     |     |  |  |     |     |
| Human     | (1)   | AATGATTTGGAGACCTTGAAGAGGAGTGTGTGGGTAGTGAGTCTAGTGTAGGGGAATCAATGCACAT  |     |     |     |     |     |     |  |  |     |     |
| Xenopus_T | (1)   | -----                                                                |     |     |     |     |     |     |  |  |     |     |
| Rat       | (1)   | -----                                                                |     |     |     |     |     |     |  |  |     |     |
| Consensus | (1)   |                                                                      |     |     |     |     |     |     |  |  |     |     |
|           |       | Section 2                                                            |     |     |     |     |     |     |  |  |     |     |
|           |       | (68) 68                                                              | 80  | 90  | 100 | 110 | 120 |     |  |  |     | 134 |
| Mouse     | (1)   | -----                                                                |     |     |     |     |     |     |  |  |     |     |
| Cow       | (1)   | -----                                                                |     |     |     |     |     |     |  |  |     |     |
| Human     | (68)  | AAGGGAAGAAAGGAGATTCTGGATTAGAGTTTTGACCCACTTGCCACCAAGAGCTCACAGGCTTCAT  |     |     |     |     |     |     |  |  |     |     |
| Xenopus_T | (1)   | -----                                                                |     |     |     |     |     |     |  |  |     |     |
| Rat       | (1)   | -----                                                                |     |     |     |     |     |     |  |  |     |     |
| Consensus | (68)  |                                                                      |     |     |     |     |     |     |  |  |     |     |
|           |       | Section 3                                                            |     |     |     |     |     |     |  |  |     |     |
|           |       | (135) 135                                                            | 140 | 150 | 160 | 170 | 180 | 190 |  |  | 201 |     |
| Mouse     | (1)   | -----GCGTGGTCCGACGGCCCGGGCTGGTCTGTTTTGTCTG                           |     |     |     |     |     |     |  |  |     |     |
| Cow       | (1)   | -----GGTATGAGTATGTGTCA                                               |     |     |     |     |     |     |  |  |     |     |
| Human     | (135) | ATTCTAATCATGAAACCCTTTTTGGTATTAGGTGGACAGGAATTTGATGACAAGATTGGTTTGTCTCT |     |     |     |     |     |     |  |  |     |     |
| Xenopus_T | (1)   | -----TGAAAAGCAGGGGTAATAGAGGGAATACCCTGCAACTGCTGGGGTG                  |     |     |     |     |     |     |  |  |     |     |
| Rat       | (1)   | -----                                                                |     |     |     |     |     |     |  |  |     |     |
| Consensus | (135) | G G GA C G A GTTTG                                                   |     |     |     |     |     |     |  |  |     |     |
|           |       | Section 4                                                            |     |     |     |     |     |     |  |  |     |     |
|           |       | (202) 202                                                            | 210 | 220 | 230 | 240 | 250 |     |  |  |     | 268 |
| Mouse     | (37)  | TATGTGTACCTGTGTGCCATG--TGCAATGCCTGTTACCTGAGGA--GACAAGAAGAGATCATCAGGT |     |     |     |     |     |     |  |  |     |     |
| Cow       | (17)  | TATTTCTGGTTGT-CCGAATG--TCCT-CTCTTTAGGCGGAGG--GAGAACTTTGCAGCACATCTCT  |     |     |     |     |     |     |  |  |     |     |
| Human     | (202) | TTTTTTTTTTTTTT-TGAGATGGAGTCTTGCTCTGTTCGCCAGGCTGGAGTACAGTGGTGTGATCTCA |     |     |     |     |     |     |  |  |     |     |
| Xenopus_T | (47)  | GGAAAGAAC TACA---CAATG-----TCCAA TTTGCCCCAGTGTGATTAAACCCTTCCACAATCG  |     |     |     |     |     |     |  |  |     |     |
| Rat       | (1)   | -----GCGCTGACACGTCCGAGAGACA TTTCACTCAGC-----AAACTC GGCCCTACCTTGT     |     |     |     |     |     |     |  |  |     |     |
| Consensus | (202) | T T T T TTGT TG ATG C TGC TTT C CAGG GA AA A GG CAC TCT              |     |     |     |     |     |     |  |  |     |     |
|           |       | Section 5                                                            |     |     |     |     |     |     |  |  |     |     |
|           |       | (269) 269                                                            | 280 | 290 | 300 | 310 | 320 |     |  |  |     | 335 |
| Mouse     | (100) | GCCCAGCCACCGCGTGGTGGTGGGAATGAAATCTGGATCTTCTGTGAAGAGCAGCTAGGGCTCTGT   |     |     |     |     |     |     |  |  |     |     |
| Cow       | (76)  | ATTCAGTGT---CTCTGATGATGAAGAGTTGAAATCCTTTGAGGGTCCAAAGCTATTTAGAGCTGA   |     |     |     |     |     |     |  |  |     |     |
| Human     | (268) | GCTCACTGCAACCTCTGCT--TCCTGGTTC AAGTGGTTCCTATG-CCTCAGCCAGCCTCTGGGAGT  |     |     |     |     |     |     |  |  |     |     |
| Xenopus_T | (105) | GGGCAGAACTATGGGGGAGGCAGAAAGAGGCACGTGGCTAGGGCG-CACCCTCTCCCTCCACTCCCC  |     |     |     |     |     |     |  |  |     |     |
| Rat       | (52)  | GACCGTGGG---GAGGCTGGCCGTTGGGATCCGTCTTCCCAAGTGAAGGCCGTTTCTGACTATGC    |     |     |     |     |     |     |  |  |     |     |
| Consensus | (269) | G CA G CG GG TGGT G GTG A TGG T GTC AA AGC T GACTCTG                 |     |     |     |     |     |     |  |  |     |     |
|           |       | Section 6                                                            |     |     |     |     |     |     |  |  |     |     |
|           |       | (336) 336                                                            | 350 | 360 | 370 | 380 | 390 |     |  |  |     | 402 |
| Mouse     | (167) | TTGTTTG--TTTGTTTGTTTGTTTGTTTGTTTTTTCGAGACAGGGTTTCTCTGTGTAGCTCTGG-    |     |     |     |     |     |     |  |  |     |     |
| Cow       | (140) | ATCTTAGCTGTGAGAAGTGGTCTGACAA CAAAAT-AGCAAGGCTGATTTTCCCA TAAAGCTC---- |     |     |     |     |     |     |  |  |     |     |
| Human     | (332) | ATAGCTGGGGTTACAGGTGC-CTGCCACCATGCCAGCTATTTTTTTTTTTTTTTTGTATTTTTAGT-- |     |     |     |     |     |     |  |  |     |     |
| Xenopus_T | (171) | TAGTCAG-AGCCCTAGTTGC--CACTTGTCAGCG-CCCACAAACACACACACAGTGA CACTGTGGG  |     |     |     |     |     |     |  |  |     |     |
| Rat       | (115) | CCACTGGACACTTACCCGATCTCTGTTG CAGGAA---CCGTTCTGTTGCAAAA TGAAGACAATCA  |     |     |     |     |     |     |  |  |     |     |
| Consensus | (336) | T TT G GT AG TG TCTG TTGCA G C A C TTTC C GTGA GCT                   |     |     |     |     |     |     |  |  |     |     |

Section 7

|           |       |             |            |           |           |           |            |                    |
|-----------|-------|-------------|------------|-----------|-----------|-----------|------------|--------------------|
|           | (403) | 403         | 410        | 420       | 430       | 440       | 450        | 469                |
| Mouse     | (232) | CTGTCCTGGA  | ACTCACTCTA | TATAGACCA | GCTGGCC   | TTGAA-CTC | -----      | AGAAATCCGCC---     |
| Cow       | (202) | AGAACCCTGG  | TCTCAGAGAT | CAGTCCAG  | ACTGGAGTT | CAAACTTGG | GTC        | T-AGCAATGGGATAAGTG |
| Human     | (396) | AGAGATGGG   | GCTTCACTAT | GTTGCCAG  | GCTTGTCT  | TTGAA-CTC | CCTGACT    | -TCAAGTGGTCCACTTG  |
| Xenopus_T | (234) | GGAAGGGAG   | TGCACACTA  | AATGT---  | GTGTTG    | TAAAAATG  | CTGAGGTGAA | TGAGCGCTGGCTAGTA   |
| Rat       | (179) | CAGTTACATTT | TCCCAAATC  | TTTGGCTG  | TATTGCAA  | TGGTTGTT  | -TCATTCT   | TGTAATCTCCAACTGA   |
| Consensus | (403) | GG          | GG         | T         | CAC       | AT        | TTG        | CCAG               |

Section 8

|           |       |            |           |           |           |           |            |            |
|-----------|-------|------------|-----------|-----------|-----------|-----------|------------|------------|
|           | (470) | 470        | 480       | 490       | 500       | 510       | 520        | 536        |
| Mouse     | (288) | CCTCTGCCT- | CTTAAGTG- | CTGGAGTTA | AAGGTGTG  | TGCCACC   | ACTGCCGAGC | --TCTTTTTT |
| Cow       | (268) | TTTTGTT-TG | CTGAGGTG  | ACTACATT  | TGGAAGG   | GAAAAA    | CAAAAATCAT | GTCCTCA    |
| Human     | (461) | CCTTGGCCTC | CAAGTG-   | CTGGAATTA | CAGGCATGA | ACCACACAT | GCC--TTGG  | TTTGTCT    |
| Xenopus_T | (298) | CATGAAAGCC | CTCATG-   | GACAGAA   | GTTCTTT   | GTA-GATC  | CACCGCAA   | AGAAC--    |
| Rat       | (245) | ACATTTCTA  | ACCATG-   | GATTAACA  | ATATAG    | GTA-CTGA  | CTGGTTAA   | CAGTATT    |
| Consensus | (470) | CCTT       | CCT       | CT        | A         | GTGACTG   | A          | TTA        |

Section 9

|           |       |            |           |           |          |           |           |         |
|-----------|-------|------------|-----------|-----------|----------|-----------|-----------|---------|
|           | (537) | 537        | 550       | 560       | 570      | 580       | 590       | 603     |
| Mouse     | (351) | TAAAGAAATG | TTTGAAGAT | TTATTATT  | TATTATAT | ---GTAAGT | AC-CTGTAG | CTGTC   |
| Cow       | (334) | CACAT-CTCG | TATGCGTAG | AGAAATACT | CCTTTGA  | -----     | TTTTT---  | CCTTAGT |
| Human     | (525) | TAAAGCCCT  | TGTACTTAT | TGCACAGGC | TGTTCTG  | AGAAAGTA  | AGATTATT  | GG-ATCT |
| Xenopus_T | (360) | TGCAATTTTT | TGCTATGGG | TCAAATG   | CTTCTGC  | CTAAAGTT  | CACTGGTTC | -CCAGT  |
| Rat       | (310) | CAAATAAAC  | TGCAATTT  | CTTACTTT  | TTTTT    | TACAAA    | ACATTTAT  | AAATATT |
| Consensus | (537) | TAAA       | TGT       | ATTA      | T        | A         | AT        | T       |

Section 10

|           |       |            |             |          |            |          |           |          |         |
|-----------|-------|------------|-------------|----------|------------|----------|-----------|----------|---------|
|           | (604) | 604        | 610         | 620      | 630        | 640      | 650       | 660      | 670     |
| Mouse     | (414) | AGACGCACC  | AGAAAG----- | AGGGCAT  | CAGATCTC   | ATTACGGG | TGTTGTGA  | AACCACCA | TGTGTTG |
| Cow       | (387) | AGAGGAATC  | TTAA-----   | AGAGTGT  | T-AGGTGG-  | TGAGTCTA | GTAGA-AT  | CAACAC   | -----   |
| Human     | (591) | AATGCATTTT | AAATTTT---  | AGGGTGG  | TGAGGTGG   | CTCACAC  | CTGTAAT-  | CTCAGCA  | ATTTGGG |
| Xenopus_T | (426) | GTACAAAC   | CAATAGGG    | ACGAATGG | GCTGCCAG   | AGGAATAA | AAGGATAA  | AAAA     | CATCAC  |
| Rat       | (377) | ATACAAAG   | CAATTTT---  | AGTGAG   | ACATACTATA | CAAA     | TGAAGGTAT | TAAAG    | CAAA    |
| Consensus | (604) | A          | AC          | AA       | CAAAA      | AGGG     | GTG       | AG       | TGA     |

Section 11

|           |       |            |           |         |          |          |           |         |
|-----------|-------|------------|-----------|---------|----------|----------|-----------|---------|
|           | (671) | 671        | 680       | 690     | 700      | 710      | 720       | 737     |
| Mouse     | (475) | CTGGGATTTG | AACCTCCG  | GA      | CCTTCGG  | AAACCAG  | TGGGTGCTC | TTACC   |
| Cow       | (438) | AAGGGAGCAA | AGGAGATG- | C--CAGG | TTGAAGA- | TTAGACC  | CTCTTACT  | GCTT--- |
| Human     | (654) | GTTGAGGCAG | AAGGATTG- | CTTGAG  | CCCAAGG  | AGTTTGA  | GACTAA    | CTAGG   |
| Xenopus_T | (488) | CTTAGTATTA | AATGCCTG  | -----   | CAGCTAA  | ATTCCCTT | ATACTCC   | CAGC    |
| Rat       | (436) | CCCACACC   | ACTGACAG  | ---TGAG | TGACC    | GTCTCG   | GAGC      | CGGC    |
| Consensus | (671) | CT         | GGA       | CA      | AA       | G        | CTG       | C       |

Section 12

|           |       |     |          |         |         |          |          |          |
|-----------|-------|-----|----------|---------|---------|----------|----------|----------|
|           | (738) | 738 | 750      | 760     | 770     | 780      | 790      | 804      |
| Mouse     | (542) | GC  | CCCTTTTT | CTTTTTT | CTTTTT  | TGGAGT   | TTCC---  | AGACAGGG |
| Cow       | (497) | --- | CGCCTCT  | TATTCTA | ATCATGG | AACTTCC  | TTAGTATT | CAGTGG   |
| Human     | (717) | CT  | CCGTCGCT | AAAA    | TTTTTT  | TGAAAA   | TT-----  | GTAATAG  |
| Xenopus_T | (549) | --  | CAAAGAT  | TCGTGT  | TATAA   | TTAAGCTT | CTTAGC   | CTAT     |
| Rat       | (500) | TAA | CAGAGCC  | ACTAAAT | TCTCCAG | AGCTAA   | ----AGG  | ATTTCC   |
| Consensus | (738) | CC  | CTC      | ATTTTT  | TTTT    | G        | A        | CTT      |



Section 13

|                 | (805) | 805        | 810  | 820         | 830    | 840           | 850           | 860            | 871                 |
|-----------------|-------|------------|------|-------------|--------|---------------|---------------|----------------|---------------------|
| Mouse (604)     |       | TGGCTGT    | ---- | CCTGGGACTC  | -TC    | TTGTAAACCA    | --GGC         | TGGCCTAAGAAATC | CACTGCCTCTGC        |
| Cow (560)       |       | TGGGTTTGTT | -    | CTTAAACTCCT | TGTA   | CTTATGCATAGAC | CGTT          | TGGAGAAGTC     | TAAATGCAATTATC      |
| Human (778)     |       | GGCTGTAAAA |      | CTTTACTCTC  | --     | TAAAGAAA      | CAAACAAC      | ATTATTAA       | AAAGTGAGCATGC-TGGGC |
| Xenopus_T (612) |       | GGATAAAGTG | CAAT | TGGGGTGTG   | TTTT   | TGTGTAGAGG    | -AAAATGACGATA | AATAG          | CTTAAATGA-----G     |
| Rat (563)       |       | TTTGCTTCAT | -    | CTTTAGGC    | CAGTAC | TTAAGGACA     | CAGA          | AAATCAATGCGT   | AATAACAAATTCATA--C  |
| Consensus (805) |       | TGG T T T  |      | CTTTAGACTC  |        | TTTAGT AA CA  | AAC           | ATGAA AA TC    | AAATGC T C          |

Section 14

|                 | (872) | 872         | 880        | 890      | 900    | 910            | 920           | 938                   |                            |        |            |         |
|-----------------|-------|-------------|------------|----------|--------|----------------|---------------|-----------------------|----------------------------|--------|------------|---------|
| Mouse (664)     |       | CTTCTGGGTG  | CTGGG      | ATCAAA   | GGCGTG | TGCTA          | CTACCACCTGGCT | TGGATTTTGTATTTTATTTAC |                            |        |            |         |
| Cow (626)       |       | ATTG        | -GGTATGTGC | ACTTAAAA | ----   | TTTAAATAC      | ----          | AGATA                 | GATAAATTACTCTCTCA--AA      |        |            |         |
| Human (842)     |       | ATTGTGGCAGG | TAC        | CTGTAA   | TCCAGC | TTCTCAGGAGGCTG | AGGTG         | GGA                   | GGATTGCTTGAGAAAT-AG        |        |            |         |
| Xenopus_T (673) |       | ATTG        | -TGTTT     | CAATAC   | CTAAT  | ----           | TGCTGCTTT     | ----                  | ATGTTGGTGGCTGCA-CGCTATC-AG |        |            |         |
| Rat (627)       |       | TTTCCACAA   | CAACAACA   | GAT      | ----   | TAAAAACA       | A-            | ---                   | GGGAA                      | GGA    | AAATGATTTT | TGTT-AC |
| Consensus (872) |       | ATTG GG A   | CTAC A     | CAAA     |        | T CTAATA       |               | AGGT GGA              | ATT ATTT                   | TATT A |            |         |

Section 15

|                 | (939) | 939              | 950    | 960     | 970      | 980     | 990     | 1005  |             |            |               |         |       |       |     |         |      |
|-----------------|-------|------------------|--------|---------|----------|---------|---------|-------|-------------|------------|---------------|---------|-------|-------|-----|---------|------|
| Mouse (731)     |       | TCTTTTGT         | --TT   | TTT     | TTTT     | TTTT    | TAAT    | TTTT  | TGAGGGGGTGT | TTTCTCTGGG | AGGAGGGTGGAAT |         |       |       |     |         |      |
| Cow (680)       |       | TGGCTGCAGA       | --AAC  | TT      | --ACAG   | TCTAAAT | AT      | -TCC  | ----        | AAATTA     | ---           | A--AAAG | TGGGC | AAAAG |     |         |      |
| Human (908)     |       | TAGTTGGAGACCAGCC | TGG    | ACA     | ACATAGAT | AGAT    | AGAT    | TCC   | GACTC       | AAAA       | AGAA          | ATA     | AAAG  | CA    | GGC | AAAAG   |      |
| Xenopus_T (727) |       | TAAA             | TGCTCA | ----    | TTT      | CTCTT   | TTTAGAT | AAA   | TGA         | ----       | ATTT          | GAGG    | AAT   | ACT   | GGT | CTGTACT |      |
| Rat (684)       |       | TGAGCA           | CGCG   | ----    | TT       | CTAA    | ACTCA   | CTGAC | TAA         | TGAC       | -CC           | TGA     | ACC   | CCA   | ACC | TTGGC   | ACTG |
| Consensus (939) |       | T TGC GA         |        | TT TACA | TTTAAATA |         | T A G   |       | ATTTA       |            | A A           | G       | GGGC  | AAAG  |     |         |      |

Section 16

|                  | (1006) | 1006            | 1020       | 1030    | 1040      | 1050          | 1060           | 1072                    |
|------------------|--------|-----------------|------------|---------|-----------|---------------|----------------|-------------------------|
| Mouse (796)      |        | TGAGAGGACC      | GGGAAGTAC  | TGG     | AATTGGGGC | GCGTTATGT     | GAAATATC       | -CAAATAATCA-ATAAAC      |
| Cow (731)        |        | TGCTAG-ACAGACA  | --TT       | CACCA   | AAGA      | AGATATAC      | AGATAACACATAAG | -CATATGAAAAGATGCTT      |
| Human (975)      |        | TGCTGA-ACAGACAC | -TT        | CACCA   | AAGA      | AGATATGC      | AGATGCAAAATAAG | -CACATGACAC-ATGAAA      |
| Xenopus_T (784)  |        | GGAGGG-AC       | TTCAC      | GGTCTCT | --AACT    | ACGCCTTAGGTCT | ATAATATCA      | CTGATAGATATATTTAT       |
| Rat (745)        |        | AGGCAGAGCA      | TTTCC      | TTTACC  | -AGCG     | GGGCTCGTGA    | -GTGAGT        | TATGACCCATGTGGT-GTAAACC |
| Consensus (1006) |        | TG AG ACAG      | CAC TTCACC | AA      | AG GCT    | AGATGT        | A ATATG        | CA ATGA A AT AA         |

Section 17

|                  | (1073) | 1073     | 1080       | 1090    | 1100   | 1110      | 1120       | 1139                                 |
|------------------|--------|----------|------------|---------|--------|-----------|------------|--------------------------------------|
| Mouse (861)      |        | AA-ATT   | AAGGTT     | AAAA    | --AAAT | CAGCGGCT  | TAAAAAA    | AT--AATTTCAAACAGAC-CTTCAATAGAA       |
| Cow (794)        |        | TGCATCGT | ATGCC      | ATT     | -GGG   | AAATGC    | AAATTA     | AACTAGCGAGATGCCACAACAC-ACCTATTAAA    |
| Human (1038)     |        | AG-AT    | CAATGTC    | ATTAGGG | CACTGC | AAAT      | TCAAA      | CAAG---ATGCAGCTACAC-ACCTATTACAG      |
| Xenopus_T (848)  |        | AT-ATT   | AGAGATGTTG | -CTC    | CTAATT | AACTT     | CTTAGGCCTG | ATATATATCTAAACGATATATTACTA           |
| Rat (809)        |        | TG-AT    | CACAGG     | AGTAA   | AATAC  | ACTTT     | TGTAA      | TCTTTCATTTGTCATATCTAGAGTCTTTCTCCATAG |
| Consensus (1073) |        | AG ATCA  | AGGT AT    |         | CACTGC | AAATTCAAA | A          | A AT CA C A AC ACCTATTA AA           |

Section 18

|                  | (1140) | 1140       | 1150    | 1160    | 1170   | 1180     | 1190    | 1206     |           |        |         |      |           |
|------------------|--------|------------|---------|---------|--------|----------|---------|----------|-----------|--------|---------|------|-----------|
| Mouse (922)      |        | GAAGGTAC   | AGGTGAT | AAATAAG | CAAGGA | AAAGGTGC | CCGGGAT | TGGGGAA  | TGGACC    | CATGGG | TAAAGA  |      |           |
| Cow (859)        |        | TGGCTAAAAT | CCAGAAC | ACTAAC  | CAACAC | CAAA     | TGCA    | ---      | G-CTAGGGT | TGGAG  | CAATGGG | AAC  | TTTT      |
| Human (1099)     |        | TGGTAAAAT  | CTGAAAC | ACTGAC  | CAATAT | CAAA     | TGTT    | ---      | GGCAAGG   | ACATGA | AGTAA   | ---- | AA----    |
| Xenopus_T (913)  |        | TATTTTATCT | AATAATA | TCTAC   | CTTTAC | CTGT     | TAGGG   | GAGAAT   | TAGTGGT   | TTTAA  | TAGAA   | GTC  | ACAAA     |
| Rat (875)        |        | AAAGTAA    | ACTTAC  | ATACA   | AGGACA | CAAAA    | ATTTACA | ---      | AGTTTC    | ATTTT  | GGTA    | CGGT | AGGCTCT-- |
| Consensus (1140) |        | TA TAAAAT  | AAACA   | ACAA    | AACA   | TGC      |         | GG TAGGG | TGGA      | CAAT   | GG      | AC   |           |

Section 19

|                  | (1207) | 1207      |                | 1220           |               | 1230                |                 | 1240          |  | 1250 |  | 1260 |  | 1273 |
|------------------|--------|-----------|----------------|----------------|---------------|---------------------|-----------------|---------------|--|------|--|------|--|------|
| Mouse (989)      |        | AA--GCGT  | GAGACC         | TAGGG--TC      | CAGTCCCTAG    | CAGCCATGTAGAA       | ACGCTGGCA       | TG-GTGGCTCATT |  |      |  |      |  |      |
| Cow (922)        |        | CATTCATTG | CTGGTGGGA--TG  | CAAAATAGTA     | CAGCTACTTCAGA | AAGATATTTT          | TG-GCAGGTTTTT   |               |  |      |  |      |  |      |
| Human (1155)     |        | ----ATTG  | CTGGTAGGAA--TG | CAAAATTGTACAGT | CACTTTGCAAGA  | CAGATTTG-GCAGTTTCTT |                 |               |  |      |  |      |  |      |
| Xenopus_T (980)  |        | CAAAGATTG | GCCCTGACA      | CCTCTG         | GGCCCCC       | CAGG--GG            | CAGAATGGAGTTGG  | GAGGAGCTGGTG  |  |      |  |      |  |      |
| Rat (937)        |        | CGGTGTG   | TGGACC         | AATGT---       | CAGGGATG      | AGAAGCCCTGT         | GATTTGACAGACA   | GGAAAGAAAGCT  |  |      |  |      |  |      |
| Consensus (1207) |        | CA GATTG  | CC GGGA        | T CAG          | G CAGCCA      | GT G A GA           | AG TG G AG T TT |               |  |      |  |      |  |      |

Section 20

|                  | (1274) | 1274      |             | 1280         |              | 1290                   |                  | 1300        |              | 1310 |  | 1320 |  | 1330 |  | 1340 |
|------------------|--------|-----------|-------------|--------------|--------------|------------------------|------------------|-------------|--------------|------|--|------|--|------|--|------|
| Mouse (1051)     |        | C CCGG    | AAACCCTCTG  | TCTAG        | GGAGCCGGG    | CATGATCTG              | GGCTCCCTGGG      | CAGCCAGCCTG | CCAGGAGG     |      |  |      |  |      |  |      |
| Cow (986)        |        | AC---     | AAAGCTAAACA | TAGTCTCA     | CCGTAGGAT    | TTCAGCAATTG            | CACTCCTAGATATTTA | CCCAATG     |              |      |  |      |  |      |  |      |
| Human (1214)     |        | AC---     | AAAGTTAAACA | TAGTCTTACTAT | GTAATCTAG    | CCATTGTGCTCCTAGATATTTA | CCAGATG          |             |              |      |  |      |  |      |  |      |
| Xenopus_T (1045) |        | GGCGTGGCA | CTGTGTC-AG  | GTTTCA       | GAGCTGGA--GG | TGAATAAAGGACA          | AAACAGTGTGG      | CCCAGGTG    |              |      |  |      |  |      |  |      |
| Rat (1000)       |        | GG--GGCT  | GGAGCG      | GGAGG        | GAAGAGTA     | AGGA-TATA              | CA CGAGA         | CTTCTTAAGA  | ATTCCACTGATT |      |  |      |  |      |  |      |
| Consensus (1274) |        | C AA GCT  | G TAGG      | TCAG G       | AGGAT TAG    | CA T GCTCCT            | ATATTTCCCCAGATG  |             |              |      |  |      |  |      |  |      |

Section 21

|                  | (1341) | 1341     |            | 1350    |             | 1360        |                | 1370       |              | 1380 |  | 1390 |  | 1407 |
|------------------|--------|----------|------------|---------|-------------|-------------|----------------|------------|--------------|------|--|------|--|------|
| Mouse (1118)     |        | AGCCTAGC | AGAGAGA    | AAGACGG | CAACGCTCTG  | CCC-CT      | CCCCCTCTATA    | CAGAAGT    | TCTGGCAC     | ACGC |  |      |  |      |
| Cow (1050)       |        | AGTTGAAA | ACTTATGTC  | TACA-CA | AAAACCTTG   | CAGACCAGAG  | TTTTGGTAGCAG   | CTT-----   | ATTT         |      |  |      |  |      |
| Human (1278)     |        | AATGGAAA | ATTTTCAG   | -----   | CAAAAACCTTG | CA--CGTGGAT | GTTTATAGCAGT   | TTT-----   | ATTC         |      |  |      |  |      |
| Xenopus_T (1108) |        | CAAC-AT  | GGGATAT    | ACTA-GG | CA--GAT     | TCCCAAGTTG  | TCTCGTTAACCT   | ATTAGTCGCC | AGTT         |      |  |      |  |      |
| Rat (1064)       |        | TGCAATAA | TTAAAGTAA  | TTTCA   | CA----      | CTAGCCGTG   | TGCAGGCGG      | TCATGAGGC  | TATGAGAAGAGC |      |  |      |  |      |
| Consensus (1341) |        | AG AAAA  | ATAT A TAC | CAA     | ACTTGCC     | CT G TCTTTA | AG AGTT T A TC |            |              |      |  |      |  |      |

Section 22

|                  | (1408) | 1408     |          | 1420      |             | 1430         |             | 1440         |          | 1450 |  | 1460 |  | 1474 |
|------------------|--------|----------|----------|-----------|-------------|--------------|-------------|--------------|----------|------|--|------|--|------|
| Mouse (1184)     |        | ACCCAA   | CCGAA    | CACATATG  | TATGCA--    | CAGGATCC     | T CAGTATAAA | AGTGAGGCGATT | GCCAATT  | TAAA |  |      |  |      |
| Cow (1111)       |        | AT--AAT  | TGCCCA   | AATTGGA   | AGCAGTCA    | AGTTGCCCTCTA | ATAGGTGA    | -----        | ATTTGAT  |      |  |      |  |      |
| Human (1333)     |        | AT--AAT  | TGTCAAAA | ACTTGAAT  | CAACCAGGAT  | TATTCCTG-AT  | AGGTGA      | -----        | AGGAAT   |      |  |      |  |      |
| Xenopus_T (1171) |        | AC---TG  | GCACCC   | ATCTG     | CCAGCCG-TAG | TATGTCCGCTCT | ACGCACG     | TCAGGGGCTTA  | ACTCAG   |      |  |      |  |      |
| Rat (1127)       |        | CT---GT  | GACGCC   | AGAGAG    | CAGGCG      | CAGGCTGGT    | AACCC--AGG- | GAAG-----    | CCCAGACA |      |  |      |  |      |
| Consensus (1408) |        | AT AA TG | CCCCA    | TGGAAGCAG | CAGGATG     | TC CT A      | AGGTGA      |              |          |      |  |      |  |      |

Section 23

|                  | (1475) | 1475      |           | 1480     |           | 1490      |            | 1500        |               | 1510     |  | 1520 |  | 1530 |  | 1541 |
|------------------|--------|-----------|-----------|----------|-----------|-----------|------------|-------------|---------------|----------|--|------|--|------|--|------|
| Mouse (1249)     |        | AATACCA   | ACGTGCT   | ACCTTCG  | TACACA-   | CGTGA     | GAATGGTGA  | AAGACTGGA   | AAGGCATGGT    | GGCACACA |  |      |  |      |  |      |
| Cow (1164)       |        | AAACAC    | ACCATGAT  | ACATTCAT | ATATAA-   | TGGAATAT  | TATTCAGTGA | TAAATAGAAAT | TGAGCTATTAC   |          |  |      |  |      |  |      |
| Human (1386)     |        | AAAC---   | CGTGGT    | ACATCCAT | GTGA--    | TGAAACGTT | TATTCAGTGA | TAAAGAAAT   | TGAGCTATTAA   |          |  |      |  |      |  |      |
| Xenopus_T (1234) |        | TTTAC--   | AAGGCT    | TATGGATG | TCC TGA-  | GCAAAGG   | CTTTACTGCT | TTAACCCCT   | CATCCCTGTAA   |          |  |      |  |      |  |      |
| Rat (1180)       |        | AGTCC     | TAACTG    | GCACATA  | AAC TCA   | TCTTCTA   | ATGTGTACA  | ATACAGGA    | AAGGAAGTCAGCA | ACTTG    |  |      |  |      |  |      |
| Consensus (1475) |        | AATCC AAC | GTG TACAT | C T T A  | TG AA GTT | TTCA T T  | AAA GAA    | TGAGC       | A TAA         |          |  |      |  |      |  |      |

Section 24

|                  | (1542) | 1542     |           | 1550    |           | 1560        |          | 1570       |       | 1580      |             | 1590    |     | 1608 |
|------------------|--------|----------|-----------|---------|-----------|-------------|----------|------------|-------|-----------|-------------|---------|-----|------|
| Mouse (1315)     |        | CCTCTA   | ATCCCAG   | TACTTGG | GAGGCAG   | GGTGGGTGGGG | --TG     | CGGATCTCTG | --TG  | AGCTTGA-G |             |         |     |      |
| Cow (1230)       |        | -CCCTG   | ATT--ATTC | ATTG-GA | AGGACTGAT | GATGAA      | GCTGATG  | CTCAA      | TA    | CT--AT    | AGCCACCTG   |         |     |      |
| Human (1447)     |        | GCCGTG   | AAA--AG   | ATACAG  | AGAA      | TCA         | TTAATCA  | CATATAT--  | TGCTA | AGGGAAA-- | GAAGCCAG--- |         |     |      |
| Xenopus_T (1298) |        | GGGCAG   | ATTGT     | AGGAATA | AGCA--    | CCTGCA      | AGAGAA   | CTGCC      | TC    | CGTTTCTA  | TGGTTACT    | CTTG    | GAC |      |
| Rat (1246)       |        | ---GAT   | ATT---    | GGCAC   | AGAGAA    | GAAGAA      | AAAGGGCA | ACT---     | CTA   | AGACAG    | CCAGAG      | TTTTCTG |     |      |
| Consensus (1542) |        | C CTGATT | AG ATAG   | GAAGCA  | G ATGAGG  | A T TGCT    | A TA     | AGCTTG     | G     |           |             |         |     |      |

Section 25

(1609) 1609 1620 1630 1640 1650 1660 1675  
 Mouse (1377) AGCTGCCTGAGCTACATAGTAA GTTCCAGGAC AACCCAGGA CTACCTAGAGAGACCCTGTCTCAAAA  
 Cow (1291) ATGTGAAGAGCCAAC TCACC--GAAAAA---AACTCTGATGCTGGGAAAGATTGAAGG---CAAAAT  
 Human (1505) -TCTGAAAA GGCTACATGT T--GTATGATTCCAACTGTAA-GATA TTCTAGAT--AAGG---CAAAA  
 Xenopus\_T (1363) AAATGCCATGGCTCCCTGCTA--CTCTGACACACGGT TTA TGTCTTTAA AAG----TGTCTCAAAAC  
 Rat (1303) -TTTCGGTTGGCTGGGTTGTGGGTGGGAG----AAGGTACATTGCTCTCA AAG--GCTGT--CTGTCT  
 Consensus (1609) AT TG GGCTAC T T GT AG AAC GT A TCTT AGAG TGT CAAA

Section 26

(1676) 1676 1690 1700 1710 1720 1730 1742  
 Mouse (1444) AGCCAGGGGGGTGGGGGACAGAGAGAGAGAGAGAGAGAGAGAGAGAGAGAGAGAGAGAGAAATTGGGG  
 Cow (1350) GAGAAGGGGACGGCA GAGGATGAGATGGTTAGATA GCATCA CCAACTCAATGGACGTGAATTGAGCA  
 Human (1563) CTATAGATCTAGACGGTGGTTGCCAGGGCTGAG-GAGTGA GGGAGGA--GGAA-TGAATAG-GCA  
 Xenopus\_T (1423) TGGGTGACCTCCTTGGTCCATCACGTGTCA CACTG-GTGA CAGAAGCACTTTATGGCA GTGATGTT  
 Rat (1361) TGTCTCGCAGAGT TTTGTCTATGTAGTGGACACAGGGGTAGAAAGGGTCCACACA CTCTGCTATTTCT  
 Consensus (1676) G AGG G GG G TG GG CAGAG G GTGA AGA CA G A G GAAT GC

Section 27

(1743) 1743 1750 1760 1770 1780 1790 1809  
 Mouse (1511) CAGGAGAGGGTGTCCCTTGTTGCTCTTACAG---GGACTGGTGT TGTGTC CCAGCCCCTCAAACTAGAA  
 Cow (1417) GACTCTGGGAGACAGTGAAGGACAGAAAAGCCTGGCA TGTGCA--GTC CATGGGTCA CAAAGAGT  
 Human (1625) GAACATGGCAG---GTTATT---AGAGTAG--TGGAAAGTATTCT--GT--ATGATACAAATAATGATG  
 Xenopus\_T (1489) CA--ACTGGTGCCCATGTCTC-----TGTGG-----GGTGTCT-----GAGAGTTTATAACAAA  
 Rat (1428) CAGCTTTTTTTT--CTTGT TGGCCTTGAACTGTGACTCC TGTCT---TCAGTCACTGACTGCTGGG  
 Consensus (1743) CA AT GGTG CC TT TTG TG AG GGA TG TGCT GTC TGA T ACAAC AG

Section 28

(1810) 1810 1820 1830 1840 1850 1860 1876  
 Mouse (1575) TAGCCTCACA AACTGCC TGTAACTT CAGCTGCA GAGATT CAGTCGCCCTCTTCTGTTTCTGTGGG-C  
 Cow (1482) CAGAC--ACA AACTTAGTGAATGAACAACAATCAAGC CACAAAAAGATGGAGAAACATTAAGCG-C  
 Human (1680) AATAC--ATGACAT TATG CATTGGCAAAGT-----GACAGAATTATATGCACAAAGAC TGAAC--C  
 Xenopus\_T (1536) ATGTTG--AAATCACTG TTTATTTACATCATGC-----CATTTTCC TTTGTAGTACAGGTATGGG-A  
 Rat (1490) ATTAC----AGGTGTATG CCAACATGCCTAGATTGCTGCTGTGT TATTTGAAAAAAGATCAAGTC  
 Consensus (1810) AAGAC A AACT T TG AT TACA CAAGA CAGT T ATTTG A AAA T AG G C

Section 29

(1877) 1877 1890 1900 1910 1920 1930 1943  
 Mouse (1641) -TCC TGCACCCACGTGCACATCTCCCA CCTCCACTTA-CATACATAAAT TAAAAAGAAAAAT-CTTTTT  
 Cow (1546) ATATTGTGAA GGGAAAGAAACCTGCTGAAAAAGTTA-CATTCTGTATGATTC CAACAAT-ATGACA  
 Human (1739) TTAATGTAAA CT-ATAGACTTTAGTTAA TAATAGTG--CATCAATATTGGTTCA TTAAT-T-GTAAACA  
 Xenopus\_T (1596) CCCGTATCCAGAATGCTCTGGGACCAA GGGTATTCCGGATAAGGGGTCTTTC CGTAAATTGGATCT  
 Rat (1553) AAAATCAAAA GCCTTCTTTCCACTGCA GGCCTAATCTGGA AAGA AACAC TCCAATGATGACCGAA  
 Consensus (1877) TA TG AAA AT CACT C TCAA A T CATAA AAT TTCA AAAAT T CA

Section 30

(1944) 1944 1950 1960 1970 1980 1990 2000 2010  
 Mouse (1705) AAAAATA GTAGCCGGTCA-TGGTGGTGCATGCCTTTAAT CCCAGCACTC GGGAGGTAGAGGCAGGC  
 Cow (1611) TGGAAAAGGTAAAAC TGTAGAGACAGTAGCTGTCTGGGAT--TGGGCA GGGAGGGAGGAAAATGA  
 Human (1802) AATGTACCACATTAATGCA-AGATATT AATTAGAGGAGAAAC TGGTGGGGAGATGGAGATAATGG  
 Xenopus\_T (1663) CCAATAGGGCTGTTCTGCC CCAATAAGGGGTAATTAATCTTAGTGGGATCAAGTACAGGTA CTG  
 Rat (1620) GGGACAACTGC GTTGGGGGATGACGAAGCAGAAATCAACGGGTACA TTTACACAGCCAGAGGATGG  
 Consensus (1944) A AA G AGT TGCA GA TG T AT A AT TAG T GGGAGAGG AGAGG ATGG

Section 31

|                  | (2011) | 2011       | 2020      | 2030       | 2040           | 2050     | 2060        | 2077                |
|------------------|--------|------------|-----------|------------|----------------|----------|-------------|---------------------|
| Mouse (1771)     |        | CAGCCTGGT  | TCTACAA-- | AGTGAG--T- | TCCAGGACAG     | CCAGGGCT | TACACAGAGAA | AACCCTGTCTCAA       |
| Cow (1676)       |        | AGAGGATA   | TCTACGG-  | CAGTGAGA   | ACATTCTGTACAA- | TACTGCTG | CTGCTGCTGCT | AAGTCGC             |
| Human (1868)     |        | GAACTCCC   | TGTATTTT  | CTGTTCA    | ATTTTTTGTAAAC  | CTAAAAC  | TACTGTAGA   | AATAATCCATTAA       |
| Xenopus_T (1730) |        | TTTTATTAT- | TACAG--   | AGAAAAGGG  | AATCATTTAAC    | CATGAAAT | AAACC       | CAATAGGGCTGTCTTG    |
| Rat (1687)       |        | CCGGAGGGA  | --ACGAG   | CCC        | TACAGTAAC      | CAAAACGA | CCTCCGATC-  | CCGCTGACGGCTGGGGTGG |
| Consensus (2011) |        | T TAC      | CAGT      | A A        | TATTCAGTACA    | C A      | GCTAC       | CC A A GCTG TTG     |

Section 32

|                  | (2078) | 2078 | 2090      | 2100     | 2110     | 2120       | 2130       | 2144     |              |         |             |              |             |    |
|------------------|--------|------|-----------|----------|----------|------------|------------|----------|--------------|---------|-------------|--------------|-------------|----|
| Mouse (1833)     |        | AA   | CAAAACAAA | CAAA--   | -----A-  | CAAAAAA    | -----GTATA | CTT      | CAGCCGTTGAGT | CAGAAAG |             |              |             |    |
| Cow (1741)       |        | TT   | CAGTCGT   | GTCCGAC- | TCTGGGCG | ACC        | CATAGA     | -----TG  | GCA          | GCC     | CACGGGCTCCC | CGTCCC       |             |    |
| Human (1935)     |        | TTA  | ATAAT     | AATAA    | AAT      | TGTACAGATT | CACCAAGA   | -----GT  | GTA          | -CA     | TTCTAC      | TTCCA        | CTCTCTT     |    |
| Xenopus_T (1794) |        | CC   | CAATA     | AGGGT    | AATTA    | TATCTT     | AGTTGGG    | ATC      | -----AA      | GTA     | CAG         | CTACTG       | TTTTATTATTA | CA |
| Rat (1751)       |        | AGGT | TGGTGG    | AGGC     | AGCAA    | ACAGC      | AG         | CACCATGA | CCTGTTACT    | TAC     | GG          | CAGGAAGAGAGC | CAGTAGC     |    |
| Consensus (2078) |        | CA A | AG A      | AA T     | TA       | A          | CAC        | AAGA     | GTAC         | CA      | C G         | TT           | CAGTA       |    |

Section 33

|                  | (2145) | 2145 | 2150       | 2160       | 2170  | 2180   | 2190    | 2200   | 2211    |          |         |        |            |           |
|------------------|--------|------|------------|------------|-------|--------|---------|--------|---------|----------|---------|--------|------------|-----------|
| Mouse (1885)     |        | GGGG | GATAAAT    | TCAAGGCT   | --AGC | CTTG   | CC-AC   | AAGG   | CAAAAT  | CTGTCT   | TCAAAC  | CAAAAC | AAATATA    |           |
| Cow (1802)       |        | TGG- | GATTCTC    | CAGGCAAG-  | AACAC | TGGAGT | GGGTTG  | CCATT  | TCCTTC- | TCC      | AGTGCAG | GAAAGT | GGA        |           |
| Human (1996)     |        | TGTT | GATGTAT    | TGGTGACAG- | AA    | TTT    | TGACATA | CATT-  | CAAT    | TGATGGAT | C       | GAGTTT | TGTTCTTTTC |           |
| Xenopus_T (1856) |        | GAG- | AAAAGGGAAT | CATTT-     | AAC   | CATG   | AAATAA  | ACCAAT | AGGG    | CTGT-    | TCTGC   | CCCAAT | AAAGGGT    |           |
| Rat (1818)       |        | AACA | GAGCA      | TCATG      | CTGTG | TAC    | AGGCC   | CA     | CAGGAGC | GGAAAC   | CAGGGAA | C      | GCTCCC     | CGAAAGAAC |
| Consensus (2145) |        | GG   | GAT        | TCATG      | CTG   | AAC    | TG      | CATA   | A       | CAA      | TCCTG   | TC     | A C        | CAG AA GT |

Section 34

|                  | (2212) | 2212 | 2220      | 2230      | 2240       | 2250   | 2260       | 2278      |           |          |          |         |          |
|------------------|--------|------|-----------|-----------|------------|--------|------------|-----------|-----------|----------|----------|---------|----------|
| Mouse (1949)     |        | AA   | TATAAC    | AAGTCATTC | AAGCTAGTCT | TGGTTG | GACGTCT    | GGGATGGTA | ACTCTGTAT | TTTCTGTT |          |         |          |
| Cow (1866)       |        | AA   | AGTGA     | AGG---GA  | AGTCGCT    | CAGTT  | TGTGTC     | CGACTCT   | -----TAG  | CGGC---C | TCATGG-- |         |          |
| Human (2061)     |        | TTTT | TTGAGAC-- | GTCAT     | TTCACTCTT  | TGTAC  | CCAGGCT    | GAGT--    | GCAAT     | GGCGCAA  | TCTTGGCT |         |          |
| Xenopus_T (1920) |        | AA-- | T-----    | TATAT     | CTTAGT--   | TGGGAT | CAAGTACAGG | -----T    | ACTGT---  | TTATTATT |          |         |          |
| Rat (1885)       |        | A    | TAAAT     | AAAAAGA   | GGA        | AGGCT  | CACGG      | TGAG      | CGAGGAGC  | ACCACG   | GCGAGG   | CGGGCC  | CAGGACA  |
| Consensus (2212) |        | AA   | T A A     | G         | AT         | TACTC  | TGTGA      | C         | AGTCT     | G        | G        | AACGGCG | TCATGG T |

Section 35

|                  | (2279) | 2279 | 2290    | 2300     | 2310      | 2320    | 2330     | 2345   |         |        |           |          |            |
|------------------|--------|------|---------|----------|-----------|---------|----------|--------|---------|--------|-----------|----------|------------|
| Mouse (2016)     |        | CA   | CAATTT  | TGTAAGC  | CAATATCTA | CTGGGGG | CTGGAG   | AGA    | TGGCT   | CAGTGG | TAAAGAGC  | ACTG--   | AC         |
| Cow (1917)       |        | -AC  | -----   | TGCAGCC  | CACCA     | GGCTCC  | ----T    | CGTCC  | ATGG    | GACT   | TCCCAGG   | CAATAGT  | ACTGG-AG   |
| Human (2124)     |        | CAC  | -----   | TGCAACC  | TCCACTT   | CCGGGT  | -T       | CAATTG | ATG     | CTCC   | TCC       | TAGCCTCA | CAAGTA--AC |
| Xenopus_T (1965) |        | -AC  | AG---   | AGAAAAGG | AA        | CCATTT  | ----T    | TAAAA  | ATGTGAT | TATT   | TGATTAAGA | ----     | TGG-AG     |
| Rat (1952)       |        | TG   | CCCGTC  | TCTG     | CTCAGT    | TCCT    | TCCTTTAG | TGGCCT | GC      | TGGT   | TGTGACC   | TTTGGTTT | ACTGTGTT   |
| Consensus (2279) |        | AC   | TGCAACC | A        | ATCCTC    | CTG     | ATGTG    | CT     | T       | TTAAGA | ACTG      | A        |            |

Section 36

|                  | (2346) | 2346    | 2360   | 2370     | 2380     | 2390   | 2400   | 2412   |        |         |         |         |       |         |           |        |
|------------------|--------|---------|--------|----------|----------|--------|--------|--------|--------|---------|---------|---------|-------|---------|-----------|--------|
| Mouse (2081)     |        | TG      | CTCTT  | CCAGAGT  | C-----   | CTG    | AGTT   | CAATTC | CCAG   | CAAC    | ACATG   | GTGG    | CTCA  | CA--A-- | CCATCT    |        |
| Cow (1973)       |        | T       | GGGGT  | GCCAT    | -TG-     | C----- | CT-    | TCTC   | CACTGT | ACAATA  | ACTAT   | TGACATA | AAT   | -GA     | TACAATAC  |        |
| Human (2183)     |        | T       | GGGATT | ACAGGTG  | -C-----  | CTG    | TAC    | CATACC | CAGA   | CAATTTT | TGATTTT | TA      | GTAGA | GACA    | GGGT      |        |
| Xenopus_T (2018) |        | T-      | CTAT   | GGGAGAT  | TGC----- | CTT    | TCGT   | AATTC  | GGA    | -----   | ACTT    | CTG     | GATA  | GA-     | GATCCATAC |        |
| Rat (2019)       |        | T       | GGGAAT | AAATGACA | C        | ACTG   | CTG    | ACTAC  | TATTC  | TCA-    | CAA     | ACGAG   | CCAG  | CGAA    | CCCTTCAA  | AAAGCG |
| Consensus (2346) |        | TGGGATT | CAG    | TG       | C        | CTGTCT | CAATTC | CA     | CAA    | A       | ATG     | G       | T     | A       | GA        | ACAAT  |

Section 37

(2413) 2413 2420 2430 2440 2450 2460 2479  
 Mouse (2140) GTAAT-GAGATCTGATGCCCCCTCTCTGGTGTGTCTGA-----AGA-CAAGTACAGTGTACTT--  
 Cow (2032) TATAC-GATATTAT--ATGATGGACTT----CCTGA-----TGTTTTCAGACAGTAAAGACT---  
 Human (2245) TTCAC-CATGTTGGCCAGGCTGGTCTTGAATGCCCTGACCTCAAGTGATCCACCACACTTGGCTTCC  
 Xenopus\_T (2074) CAGCC-GTTGTAGGAAAGTTCATTCATAGTAACTTATA-----TGTATCCCCTTAAATAGCTGGA  
 Rat (2085) TCAACTGAGAGAGCACAGCGTGAATTTTCA--AGTTGAAGCCTTTTGATCCTTGGCTGTGGCTG--  
 Consensus (2413) T AC GATAT GGA AG TG TCTT CCTGA T GT CA CAC TGG CT

Section 38

(2480) 2480 2490 2500 2510 2520 2530 2546  
 Mouse (2195) AT-ATATAAATAAATAATCTTAGAAAAATATCTACTAATTAGAAAAGACAAATTAAGTGGCGTGGTGA  
 Cow (2082) ---CTGCCCGCAATGCAAG---AGACGGGGTTCATCCCTGGGTGGGAATATCCCTAGAGAAG-  
 Human (2311) AAACCTGCTGGGATTACAGGTGTGAACCACTGTGCCCGGCACAGTTGGTATTTTATTGTTGTTT---  
 Xenopus\_T (2134) ATTTAAAATCAATGTAAATGCAAAAAGTGCTTA--GAGTAGCACTTTCATCAATTTTACATTCAC-  
 Rat (2148) ---AGGGAGAGGAGACACAGAGGCTAAATGGAAACGGAGTCAGCAACACTAAAGAACATAGGTTACGT  
 Consensus (2480) A TG A AATACA T GAAAAATGGTTC CAG A TG AAT AACT GTT G

Section 39

(2547) 2547 2560 2570 2580 2590 2600 2613  
 Mouse (2261) TGCTGAGATTGGAAGATTCTTCAATTTTCGAGGAGGCCAGCC---TGGTATAGTAAATATGAGGGCTC  
 Cow (2141) -----GGAATAGCAACCCACTCACTATTCTTTCCTGAGAGAA---TCCCATGG-ATGGAGGGGCTG  
 Human (2375) -----GGAATGCAATTTCTGCTTATTACCCAAGTTGAGATCTTTTCCA--G-ATTATGACTTT  
 Xenopus\_T (2198) TT----ACTTGAAAGTTTACTTAAATGCTCGGACTAAGGAT--ATTCG--G--ATAAGGGGTCTC  
 Rat (2212) TGC---CTTACCCGTTATAAAAACGCAAAACTCTTTAAGCTGCACGCACCAAGACCCGGGGCTC  
 Consensus (2547) T GATT GCAG TT CT CA T T C GA T AAGAT T C A G A TATGGGG CTC

Section 40

(2614) 2614 2620 2630 2640 2650 2660 2670 2680  
 Mouse (2325) TAGGGAACTTG--TCTTAAACAAG-GAAAAACAAGACAGAAACCAACCCCAAACAGCAACAAACA  
 Cow (2199) GCGGGCTATAG--TCCATGGGATCGAAAGAGTCTGACACGACTGAGCAACTAACACTAATATGATA  
 Human (2434) TCAAGTT-----TCCTAATTAT-GAATTGTCGTTCCTGGTTTTTGCCTATTTTTTCCAGT-TGAT-  
 Xenopus\_T (2255) TCCGTAATTTGGATCTCCATACCTTAAAGTCTACTAAAAAATTAATAAAATATTAATAAACCCATA  
 Rat (2276) CAGCAGCCTCCCCAGCTTGCTGCCTTAGAACTGGCTCCATGTTCCTACTGAGCTCGTGAAT  
 Consensus (2614) TCGGG T G TCCT A A GAA A TG ACAA T TTA C CT A A CAA A AATA

Section 41

(2681) 2681 2690 2700 2710 2720 2730 2747  
 Mouse (2389) TAGCCGAC---TCACTCCC TAAGGCTTCCCATGCCCTTTGCTGTGACCACAGTGGCAGATGTAATTGC  
 Cow (2264) TGATGGTGGAAACATGCCATTATGCAT----TTAGCAAAACCCATAGAACCCTGCAACACAAAGAGT  
 Human (2492) TATTGGT-----CTTTTGAATTGTGAAT----TTTTTGTATTATGTGA-ATTTGTGAGACTTAAAACAT  
 Xenopus\_T (2322) GGGCTGTTT--TGCCCCCAATAAGGGGTAATTATATCTTAGTTGGGA--TCAAGTACAGGTAAGTTT  
 Rat (2343) TCAAGCGTACACCTGGGGTTAAGAAC----AGAACATTGGC-AGA-CAGAATTCAACATAAAATATG  
 Consensus (2681) T GGT C T C ATTA G AT TTA C TTG TG GA ACAGTG ACATAAA T

Section 42

(2748) 2748 2760 2770 2780 2790 2800 2814  
 Mouse (2453) TCCTTTGGTTGATTCTTTGTTTGGCTGTTTGTTTGAGATAGGCTCTCAA-GCAGCTCCCACTGACCT  
 Cow (2327) T---AACCTAATGTAAACTATGGACTTTAGTTAATAACATACCGAAGCTGACTCATCAGTTGTAAT  
 Human (2549) T---TTTGCAATTAAATTCTTTTTTTTTTTTCAGACAGAGTCTCACTGTCAACCCAGGCTGGAGT  
 Xenopus\_T (2385) TATTATTAAGAGAAAAGGGAATCATTTTAAACCATTAAATAAACCCAAATAGGGTGTTC---TGCCCC  
 Rat (2404) C---TTAAAAAATAAAAAAACAACAACAAACCCAAAAGCCTTTGCTTCAGCAGCGTCAAC-ACAGCACT  
 Consensus (2748) T TT CA AT AAA TAT ATTTT TT AGACA ACCCTCA G C C C CTG ACT

Section 43

(2815) 2815 2820 2830 2840 2850 2860 2870 2881  
 Mouse (2519) TGAACTTGCTACACGTAGCTATGT-GCGCTACGTACTCCTTTAGTCTTGCACTCAAGAGGCAGAGG  
 Cow (2391) A-AATGTATCACACAAGTGTAAAG-TGTTAAATATAGGGAA-----ACTGGT-TGGAGGAAAGGAGT  
 Human (2613) GC AATGTGGGATCTCAGTTCAG----TGC AACCTCCACCT-----CCTGGGCTCAAGCGATCCACC  
 Xenopus\_T (2449) AAT AAGGGGT AATTATATCTT AAGTTGGGATCAAGTACAGGT-----ACTGTTTATTATTACAGAGA  
 Rat (2467) GGC A-GTCTGAGGGTGTCTGTGCGCTGTGCTACTTGGCGTCTA--AGGCCAGGCCGTGTGGGTTCCAGG  
 Consensus (2815) AA GTG A C ATCT AG G G TAATGTAC C T CCTGG CT AG GA GAG

Section 44

(2882) 2882 2890 2900 2910 2920 2930 2948  
 Mouse (2585) CAGTTGGATCTCTGTGCA TTTGAAGCAATCTGTTCTACAAGGTGAGTTTCAGGCCAGCCCTGGGCTA  
 Cow (2450) ATCTAGAACTCTGTATT TTCTGTTCATTCTTTGTA AAC-----TAAA CTG--CT---CTA  
 Human (2671) TGCCTTGGCCTCCCAAGTACTGGGATTA CAGGCA TAGCCAC-----CATGCCTGGCCA---CTG  
 Xenopus\_T (2511) AAAGGGAATCATTTAACCA TAAATAAAC C-----CAAT-----AGGGCTGTTCT--GCC  
 Rat (2531) CAGAGCACTGGCTGTGCTCAGAGGGCCGAGCATGGAAGGAG-----AGTCATGGGGTCT--TTC  
 Consensus (2882) A GAATCTCTGTA TTCT AGAA C G TA AA AGGCCTG CT CT

Section 45

(2949) 2949 2960 2970 2980 2990 3000 3015  
 Mouse (2652) CAAAATGAGAGAGACCC TGTCTAA AATAA AACAAAC TCACAAA CACCCA ACCACTAAGATAGGGC  
 Cow (2504) GGAAAT-AGAATCTATTACTTAA AATAA AC AATAAATTTACAGATTCATCAAGGATGTACATCTCAT  
 Human (2729) TATATT-AC TTTTAATTTTACAA GTTGCA AATGTTTCTCACGATCTGTCACTTTCTTTCTTTCTT  
 Xenopus\_T (2560) CAATAA-GGGTAAT TATACTT AAGTTGGGATCAAGTACAGGTACTGTTT TATTATTACNNNNNNNN  
 Rat (2590) CCTACGC AAA TACCCTCTCC CCAA AACAG AACAAAGCAA ACCACTACTTTGGAGCTGCA GTGAGA  
 Consensus (2949) CAAAAT AGA T T T TC AAAAT A AACAAATTCACA AAT T A AT T AT

Section 46

(3016) 3016 3030 3040 3050 3060 3070 3082  
 Mouse (2719) TGGAACTTGGAATTA TTTG TTTGT-GATCTTTAGTTTGAGACAAGGTTTCTCTGTGTATCCCTGGAT  
 Cow (2570) TTCTGTTATCTTTGT TTTGCACTG--GTGACAG AATTTT-GACAGGTGTTCAATTTG-----ATGGGT  
 Human (2795) TCCTTCTTCTCTTCT TTTCTTTGTCTTT TTTAA AATTTGAGACAGGGCC TCACTCTGTCACC CAGGCT  
 Xenopus\_T (2626) NNNNNNNNNNNNNNNNNNNNNNNNNNNNNNNNNNNNNNNNNNNNNNTTGCAACCAATAA--AATGAT  
 Rat (2657) GAGTCTTTTAAAAAAGTGGCTTCT--ATCAGTCCTGTTTGA TTTTCTTTAATAAGT----CT-GTT  
 Consensus (3016) T T TTT T TT CTTTG T A TTT GACA G TTCAAT TGT CTGG T

Section 47

(3083) 3083 3090 3100 3110 3120 3130 3149  
 Mouse (2785) ---GTCCTGGAAC TCTTTGTAGACCAG-----GCTGG CCTGGAACTC-AGAAATATGCCT  
 Cow (2629) CAAGTATGGT----CTTTTATTGTGTTTAA---TTGC GTTGC CCAATTGTTCTACTTAGATTGAC  
 Human (2862) GGAGTGCAGTGGCAGATCATGGCTCAGTGCAGCCTTGAAC TCC CAG--GCTCAGGTGATCTTGCC  
 Xenopus\_T (2687) T--GTATTATGAGGTAGTGGGCA TCCAGT-----AATCC C CAGGAGCTAAAGTATCTAAGA  
 Rat (2716) CTTT TGAAATGAC-TTATGATTGTCAAAT-----GTTAC C CAGG G CCAAGTGTACTGTGGTC  
 Consensus (3083) GT GTGAC C T AT GTCCAGT GTT CCCAGG GCTC AGT AT T G C

Section 48

(3150) 3150 3160 3170 3180 3190 3200 3216  
 Mouse (2837) ACCTCTGCTTCCCTAGTGA TAGGATTGACAGTGTGGGC-----CA--C---TGCTGTC TTTGTTT  
 Cow (2689) ATGTTT---TCCAGA-TCC TTGGACTTTCCAGATTCACTTGT TATAAATCACC TGTTCA TTTCTTT  
 Human (2927) ACCTCAGCC TCCAGAGTAGCTGGGAGA ACTACAGGTG CATGCCACC ATAC-CCAGCTAATTTT TTT  
 Xenopus\_T (2743) AACATT-----ACA--A TACAAATCATAAATATGCC C-T-----TTGTACTTCTATCT  
 Rat (2773) TCGAGTG-----ACAGTGC TAAGAAACA AACCA CAAAACAAATTAACCAACAA TG GCCATAAAAC T  
 Consensus (3150) ACCT TG TCCA AGT TAGGAAT ACAA ATG C T A C TG T ATTTT TTT

Section 49

(3217) 3217 3230 3240 3250 3260 3270 3283  
 Mouse (2892) GTAAATCTTAACACATGTGAATGGTGGTTTTTCCTGCCGTAG-----GTCGTGAATCATTTATGTTG  
 Cow (2752) GCCTGTTTTTTTCAC-GTGAATGTTGATTTTTTAAGA-TGTGG-----AACGTGGCTTTTTTTTTTT  
 Human (2993) TTTTTTTTTTTGTGTGTGTGTGTGTGTGGAGA-TGGGGTCTTCCTATGTAGCCCAGGCTGGTC  
 Xenopus\_T (2787) ATGTTGTTCTCCCC---AAAGAGCCTATCTGATGC-TGGGT---CCCTGGATAAATGCCCTTTTTC  
 Rat (2835) CCATGACACTTTGAA--A-TGTGGAGGGCCATATCGGACGTCTTT---CTAGAGAGGGGGGTTTACTG  
 Consensus (3217) T TT TT TT GTGA TG GGT TTT GA TG GG CT TGTAG T TTTT T

Section 50

(3284) 3284 3290 3300 3310 3320 3330 3340 3350  
 Mouse (2954) TCTGGCTCATGG-AGCCAGTATT-----GGGTATCAGATCCC-CTAGAAGTACTGATTACAGATGGGG  
 Cow (2812) TTAAACATGTTG-CAAATGTTTTCTCACAACTGTGTCATTTGTT-TTCAACTTGGATA---ATGATC  
 Human (3059) TTGAACCTCTGGGCTCAAGTGATCCACCCAACT-TGGTCTCCC-AAAGTGCTGGGATT---ATAGGC  
 Xenopus\_T (2846) CCTGCCCTTGGGCAGTCACTGAGCTTGGGGACTTATATCTACAGTGTAGTATTAGTGTTTGTATATAT  
 Rat (2895) AGGGTCTCTCTGAGCCACGAAG---ACATGTATTGCTCTTCAAAAAGAACAGGGTGG-AGATTAGA  
 Consensus (3284) T TG CTC TGG AGCCAGT ATC A CT T AT T CC TAGAAGTGGG T AT G

Section 51

(3351) 3351 3360 3370 3380 3390 3400 3417  
 Mouse (3013) GTGAGCTTTTGTGTGGGTGCTGGGAACCAAGTCTGAACTCTCTGTTAAGAGCAGTCAGTGTCTTTAAC  
 Cow (2874) ----TCTTTTGTGCCCATTTGTTGTTGTTTAGTTACTAAGTCCGTCCAACCTTTTGCCACCATTAG  
 Human (3121) GTGATCCACGTGTGCTGGCCCTGTCATTTCTTTCTCAGAGAGGATAACAATTTATTGTCTACAG  
 Xenopus\_T (2913) ---AGTTTATGTATGTGAGTGTATAGATAGTTAAGTATAGGGTGTGGGTGC--TGGGTTTACTTGGGA  
 Rat (2957) AAGATAACCTGTGACGGAGGACCAAGCAGGCTGGGGAAGCAGGAGACGTTTTCATTGTGCTTTGCTGGGA  
 Consensus (3351) GATCTT TGTG C G G TGTAG T GT GTA G TGT C TT G T T CTT A

Section 52

(3418) 3418 3430 3440 3450 3460 3470 3484  
 Mouse (3080) CACGGAGCCATCTCTCCAAATCCCCCTCTTTGGCCTCAGACTCACAGACC CAAGAGAACCCTCACTGAG  
 Cow (2937) AATGTTTCAAATTTTGAAGGAGGTAGCCTGGAAATGTGCTTCTGGGG---AGACACATGATGTGAT  
 Human (3188) AAAGTTTTAAATGTTGAAGGAGATGGCCTGGAAATATGCTTTTGGGG---AGCAACACGGTCTGAG  
 Xenopus\_T (2975) TGGGTTGAACTTGATGGACTCTGGTCTTTTTTCAACC--CTATGTAAGTCTGTAAGTATGTTCTGAA  
 Rat (3024) GAGAAATGTAACCTGTCCAGGGCAGGGTCTGGGGGAGG-----ACGGCTGCTATTAACACTCTAGGAT  
 Consensus (3418) A GTTG AA TG TG AGG T TCTTGG AA CT GG C AGAAACACG TCTGA

Section 53

(3485) 3485 3490 3500 3510 3520 3530 3540 3551  
 Mouse (3147) GCGTGCAGGAAC TGCC---CAGCCATAATCTTTTAGCCAGCCTCTGTCTTTTGGCTCTGGATTCTT  
 Cow (3001) CCGAGCTAGACTTGCAGATGAAGCCCAATCTCTGCCAGTCTC-GTCTTTTGTGCTCCTGATGCTC  
 Human (3252) CC-----AGACATCCAGATACAGCCCAATCTCTGCCAGTCTT-GCCCTTT--GCTCCTGATTCTC  
 Xenopus\_T (3040) CCT-----CTTGCGGA---ACTCATTTCTCCATTATCCCCTCATTCGTG--CTCCTGGTGTGT  
 Rat (3086) ACT-----ATTTACA-----GCTGCTTCTAAAATGGA-----GTCCGTTT--CTACAACGCCTT  
 Consensus (3485) CC GACTTGCAGA AGCC ATTCTTCT GCCAG CTC GTCCTTTT GCTCCTGAT CTT

Section 54

(3552) 3552 3560 3570 3580 3590 3600 3618  
 Mouse (3210) GA--GCTG-----AGCTGGGTCCAGCATGTATATAACGAGAGACTCCTCCTGGCCAATGTTTTGT-  
 Cow (3067) CAA-GCTGAACCCAGAGCTCTCTGCTCCA-GGCTGTCCATGGAGGCGCTTGTGACCAATGTTCTGAA  
 Human (3311) CAA-GCTGTACCCAGAGCTTTCTGTTCA-GCATGTACCTGGAGGCTGCTTTTGACCAATGTTTTGAG  
 Xenopus\_T (3096) GAAAAGAG-----AAATCCACTAACCA-GTAAAAGGAGGATTATACCTGGTGTCTTATGTAGTG--  
 Rat (3133) C---GCTG-----TGGTCCGGGATGAA--CTTTTCAGGCAG--TTTTCCGTCGAAGCCATTGG-  
 Consensus (3552) CAA GCTG AGCTC TG T CA G AT T CA GGAG CTCCT TG CCATGTTTTG

Section 55

(3619) 3619 3630 3640 3650 3660 3670 3685  
 Mouse (3267) ATGGCATAAGCTT-TGTCTAATGGGATGACCCGGCTAAAAGAGATTAGT-GACTGCGTTGTGGATCC  
 Cow (3132) ACTGGCACGGCTT-TATCTAATGGGATGAACCCGGCTAAAAGAGATTAGCAGAATGTCTTGTGGATCC  
 Human (3376) AGTGGCATGGCTT-TATCTAATGGGATGAACCCGGCTAAAAGAGATTAGCAAAATGTCTTGTGGATCC  
 Xenopus\_T (3153) ---GCCAGAGCTTCTCCCAAATGGGATGAAGGAGATTAGAGGTATTAGGATGACGTCTTGCGAATGT  
 Rat (3185) ---AGAAAAGCTGGGGAAAGTCCAAGTCCACCGCGCCGCTGGG---TCGTTCGGCCCGC  
 Consensus (3619) A TGGCA AGCTT T TCTAATGGGATGAACC GGCTAAAAGAGATTAG A AATGTCTTGTGGATCC

Section 56

(3686) 3686 3700 3710 3720 3730 3740 3752  
 Mouse (3332) CACTTTT-T-AATCTGCAGTGTTCGGACTGTCCCTCCTTGGCTGGGAAGGACTCTG-----CAGATA  
 Cow (3198) CACTTTT--AATCTGCAGCTTTCAGGCTGTCCCTCTTGGTTGGGAAGGGAGCT-----ACAGCGA  
 Human (3442) CACTTTT--AATCTGCAGCTTTCAGGCTGCCCTTCTTGGCTGGGAAGGGCGCTGAAGAAAACAACGC  
 Xenopus\_T (3217) CAGTTTAAACCACCTGAACACTGAGTCTCTCCCTTCTTTGGTGG-AACGGGCGC-----CCAGA  
 Rat (3246) CCGCAT----TCTTGAGT-TCCAGGATGTTCTTAAAGGTTTCTCTAGGCTCTTG-----GTGAGC  
 Consensus (3686) CACTTTT AATCTGCAGC TTCAGGCTGTCCCT CTTGG TGGGAAGGGCGCT CAGAGA

Section 57

(3753) 3753 3760 3770 3780 3790 3800 3819  
 Mouse (3392) CGGC GGCCTAGATTAGCTCC-----G-----GCTACC GTTACTG-----  
 Cow (3257) CGACGGGAGGACTGCTCCTTTCATGAGCTGTGACTCTGAGGTCCCTGCTCCACTCGAGGGTTAAC  
 Human (3507) CCAGGAC CAGGACTATCCCTGCTCAAAGCTGTGATTCGAGACCCCTGCCACCACTACTG-----C  
 Xenopus\_T (3276) AGTAGGTGTAGGTGTTGTCCT--GCCGATTTCCCTTTCGTGATTGTGCTATTAAATATCC-----T  
 Rat (3303) TGGAGATCTGCTGGGTTTCCCGACCCTTTCA-T--GATGTC--TGTGTGTA AACCT-----C  
 Consensus (3753) CG GG CTGGATT GCTCC C GCTGT A T GA G C TGCTACCA TAC G C

Section 58

(3820) 3820 3830 3840 3850 3860 3870 3886  
 Mouse (3426) A---GTTAACGGGGATCCCAAGCTAGGAGGCCCCAAATGGG-----CAACTCCCTGCA  
 Cow (3324) AGGGGTTAACAGGGTCCCGGGCTAGGG--GG-CACAACATGGGCAGCCCCAGAGCAGCTCCCTTCA  
 Human (3568) A---TTACGGGGATCC CAGGCTAGTG--GGACTCGACATGGGTAGCCCCAGGGCAGCTCCCTACA  
 Xenopus\_T (3335) C-CCC TT--CGGTGACTCCAGGATTCCTCTTGGCCACGTAGGGTCTCCAGTATGGAACAACGT-CA  
 Rat (3359) ATTCTTT---GGGGAATTCTCAGGGCTTTGTCTTGGAAGGAGT-----CGAGGCACGGCA  
 Consensus (3820) A TT ACGGGGATCCCAGGCTAG G GG CCC ACATGGG CC GCAACTCCCT CA

Section 59

(3887) 3887 3900 3910 3920 3930 3940 3953  
 Mouse (3478) GCTTGGGCCCATGGTGTCTTCCC TAGACCCTAGCGGTCCAGC-CCCGGAGCT-CACTCGGATTAGG  
 Cow (3389) GCTTGGACCGTCTGCACCTTCCCAAGGCCCTGAGTCTTCAGC-CTCTGGGCT-TATTGAGGTCAGG  
 Human (3630) GCTTGGGCCATCTGCACCTTCCCAAGGCCCTAAGTCTCC-GC-CTCTGGGCT-CGTTAAGGTTTGG  
 Xenopus\_T (3398) CCTCTTGCCTCCATTATTCGAGGACTGACTGCTAATCTCC---GACAGATCT-TAATACGGAAAT-  
 Rat (3412) TCT----CAATGTGCGAGCTGGCCAGGATACCCGGGAGCTTGTCTCAGAGCCATGGTCTGGCCTG-  
 Consensus (3887) GCTTGGGCC TCTGCACCTTCCCAAGACCCT AGTCTCC GC CTC GAGCT TA T GGT AGG

Section 60

(3954) 3954 3960 3970 3980 3990 4000 4010 4020  
 Mouse (3543) AGTGGAGCTGAACCGTGGGAGGCTG--C--TGAACGCACTCGGTAAGCATGGCGCTGCTCAAAGTC  
 Cow (3454) AGTGACAGCTGTGCTGTGGGAGGCTA--CCTGGACTGCACCTGCAAGT-----  
 Human (3694) GGTGGAGCTGTGCTGTGGGAAGCAA--CCGGACTACA CTGGCAAGC-----  
 Xenopus\_T (3459) ATTGATATCTGCTGTTTCTGCATC--CC---ACC CATTGCAACC-----  
 Rat (3474) -GGCAAAGTTTGTGGGTGGCCTTCAGGGCCTGGAGAGCACCCG-----  
 Consensus (3954) AGTGA AGCTGTGCTGTGGGAGGCT CC GGA GCACTCGGCAAG



Section 61

(4021) 4021      4030      4040      4050      4060      4070      4087  
 Mouse (3606) AAGTTTGACCAGAAGAAGCGGGTCAAGTTGGCCCAGGGGCTCTGGCTTATGAACTGGCTGTCCGTGT  
 Cow (3501) -----  
 Human (3741) -----  
 Xenopus\_T (3501) -----  
 Rat (3516) -----  
 Consensus (4021)

Section 62

(4088) 4088      4100      4110      4120      4130      4140      4154  
 Mouse (3673) TGGCCGGCATCGTCCTCTTCAGCTTGGGGCTGTTCTTGAAGATTGAACTTCGCAAGAGGAGCGAAGT  
 Cow (3501) -----  
 Human (3741) -----  
 Xenopus\_T (3501) -----  
 Rat (3516) -----  
 Consensus (4088)

Section 63

(4155) 4155   4160      4170      4180      4190      4200      4210      4221  
 Mouse (3740) GATGAATAATTCTGAGAGCCACTTTGTGCCCAACTCCCTGATAGGGGTGGGGTCCTGTCCTGTGTC  
 Cow (3501) -----  
 Human (3741) -----  
 Xenopus\_T (3501) -----  
 Rat (3516) -----  
 Consensus (4155)

Section 64

(4222) 4222      4230      4240      4250      4260      4270      4288  
 Mouse (3807) TTCAACTCTCTGGCTGGGAAGATCTGCTATGATGCCCTGGACCCGGCCAAGTACGCCAAGTGGGAAGC  
 Cow (3501) -----  
 Human (3741) -----  
 Xenopus\_T (3501) -----  
 Rat (3516) -----  
 Consensus (4222)

Section 65

(4289) 4289      4300      4314  
 Mouse (3874) CCTGGCTGAAGCCGTACCTGGCTGTC  
 Cow (3501) -----  
 Human (3741) -----  
 Xenopus\_T (3501) -----  
 Rat (3516) -----  
 Consensus (4289)

**Supplementary Figure 3. Clustal alignment of the Rds promoter regions from multiple species. a.**  
3.5kB of the 5' Rds promoter region (upstream of the transcription start site) plus the 5' untranslated region underwent Clustal alignment using Invitrogen's vector NTI.
